# Supplementary material
Source: MDPI journal article supplement (https://www.mdpi.com/2673-7655/3/4/29)
Supplement: s1 [file s1]

***Protein meal values of soybean genotypes with yield and seed oil comparable to check cultivars, and seed protein superior to check cultivars.***

|                       |                        | Meal Protein       |                   |
|-----------------------|------------------------|--------------------|-------------------|
| Genotype <sup>a</sup> | Test Name <sup>b</sup> | Value <sup>c</sup> | Rank <sup>d</sup> |
| N18-1635              | Test 1                 | 50.63 (106%)       | 15                |
| N18-1620              |                        | 50.13 (104.9%)     | 16                |
| N18-1783              | Test 2                 | 53.61 (108.7%)     | 8                 |
| N18-1586              |                        | 52.7 (106.8%)      | 9                 |
| N18-1627              |                        | 52.65 (106.7%)     | 10                |

<sup>a</sup>The genotype name.

<sup>b</sup>The test name

<sup>c</sup>The genotype marginal mean for the phenotype. The percent in the parentheses is calculated by dividing the value of each trait for each genotype by the averages of the checks in each test.

<sup>d</sup>The ranking of this genotype for the phenotype within its test.
