# Supplementary material
Source: MDPI journal article supplement (https://www.mdpi.com/2673-7655/3/4/29)
Supplement: s1 [file s1]

***RIL - Yield check contrasts for all genotypes and phenotype combinations  
with relevant summary statistics.***

| Test name <sup>a</sup> | pheno <sup>b</sup> | contrast <sup>c</sup> | estimate <sup>d</sup> | SE <sup>e</sup> | df <sup>f</sup> | t.ratio | p.value |
|------------------------|--------------------|-----------------------|-----------------------|-----------------|-----------------|---------|---------|
| Test 1                 | Maturity Date      | LMN09-119 - Checks    | -3.81                 | 0.82            | 34.94           | -4.65   | 0.00    |
|                        |                    | N09-09 - Checks       | -1.06                 | 0.82            | 34.94           | -1.30   | 0.98    |
|                        |                    | N18-1572 - Checks     | -4.22                 | 0.82            | 34.94           | -5.15   | 0.00    |
|                        |                    | N18-1595 - Checks     | -3.81                 | 0.82            | 34.94           | -4.65   | 0.00    |
|                        |                    | N18-1604 - Checks     | -2.93                 | 0.82            | 34.94           | -3.57   | 0.02    |
|                        |                    | N18-1620 - Checks     | -2.65                 | 0.82            | 34.94           | -3.24   | 0.04    |
|                        |                    | N18-1632-1 - Checks   | -2.40                 | 0.82            | 34.94           | -2.93   | 0.10    |
|                        |                    | N18-1632-2 - Checks   | -2.81                 | 0.82            | 34.94           | -3.43   | 0.03    |
|                        |                    | N18-1635 - Checks     | -1.51                 | 0.86            | 43.07           | -1.77   | 0.78    |
|                        |                    | N18-1641 - Checks     | -0.69                 | 0.82            | 34.94           | -0.84   | 1.00    |
|                        |                    | N18-1674 - Checks     | -2.51                 | 0.82            | 34.94           | -3.06   | 0.07    |
|                        |                    | N18-1682 - Checks     | -2.95                 | 0.82            | 34.94           | -3.60   | 0.02    |
|                        |                    | N18-1731 - Checks     | -3.00                 | 0.82            | 34.94           | -3.66   | 0.01    |
|                        |                    | N18-1751 - Checks     | -3.23                 | 0.82            | 34.94           | -3.94   | 0.01    |
|                        |                    | N18-1763 - Checks     | -2.98                 | 0.82            | 34.94           | -3.64   | 0.01    |
|                        |                    | N18-1855 - Checks     | -1.38                 | 0.82            | 34.94           | -1.68   | 0.84    |
|                        |                    | N18-1956 - Checks     | 0.81                  | 0.86            | 43.07           | 0.94    | 1.00    |
|                        | Height (inches)    | LMN09-119 - Checks    | 3.55                  | 1.67            | 37.37           | 2.12    | 0.50    |
|                        |                    | N09-09 - Checks       | 4.46                  | 1.67            | 37.37           | 2.67    | 0.17    |
|                        |                    | N18-1572 - Checks     | 3.79                  | 1.67            | 37.37           | 2.27    | 0.40    |
|                        |                    | N18-1595 - Checks     | 0.59                  | 1.67            | 37.37           | 0.35    | 1.00    |
|                        |                    | N18-1604 - Checks     | 1.04                  | 1.67            | 37.37           | 0.63    | 1.00    |
|                        |                    | N18-1620 - Checks     | 0.10                  | 1.67            | 37.37           | 0.06    | 1.00    |
|                        |                    | N18-1632-1 - Checks   | 3.37                  | 1.67            | 37.37           | 2.02    | 0.59    |
|                        |                    | N18-1632-2 - Checks   | 2.37                  | 1.67            | 37.37           | 1.42    | 0.95    |
|                        |                    | N18-1635 - Checks     | 1.58                  | 1.67            | 37.37           | 0.95    | 1.00    |
|                        |                    | N18-1641 - Checks     | 0.10                  | 1.67            | 37.37           | 0.06    | 1.00    |
|                        |                    | N18-1674 - Checks     | 4.40                  | 1.67            | 37.37           | 2.63    | 0.19    |
|                        |                    | N18-1682 - Checks     | 2.52                  | 1.67            | 37.37           | 1.51    | 0.92    |

| Test name <sup>a</sup> | pheno <sup>b</sup> | contrast <sup>c</sup> | estimate <sup>d</sup> | SE <sup>e</sup> | df <sup>f</sup> | t.ratio | p.value |
|------------------------|--------------------|-----------------------|-----------------------|-----------------|-----------------|---------|---------|
|                        |                    | N18-1731 - Checks     | 4.77                  | 1.67            | 37.37           | 2.86    | 0.11    |
|                        |                    | N18-1751 - Checks     | -1.74                 | 1.67            | 37.37           | -1.04   | 1.00    |
|                        |                    | N18-1763 - Checks     | 2.67                  | 1.67            | 37.37           | 1.60    | 0.88    |
|                        |                    | N18-1855 - Checks     | 2.45                  | 1.67            | 37.37           | 1.47    | 0.94    |
|                        |                    | N18-1956 - Checks     | 7.56                  | 1.67            | 37.37           | 4.52    | 0.00    |
|                        | Lodging            | LMN09-119 - Checks    | 0.00                  | 0.22            | 38.00           | 0.00    | 1.00    |
|                        |                    | N09-09 - Checks       | -0.42                 | 0.22            | 38.00           | -1.91   | 0.67    |
|                        |                    | N18-1572 - Checks     | -0.17                 | 0.22            | 38.00           | -0.77   | 1.00    |
|                        |                    | N18-1595 - Checks     | 0.42                  | 0.22            | 38.00           | 1.91    | 0.67    |
|                        |                    | N18-1604 - Checks     | 0.83                  | 0.22            | 38.00           | 3.83    | 0.01    |
|                        |                    | N18-1620 - Checks     | -0.50                 | 0.22            | 38.00           | -2.30   | 0.38    |
|                        |                    | N18-1632-1 - Checks   | -0.50                 | 0.22            | 38.00           | -2.30   | 0.38    |
|                        |                    | N18-1632-2 - Checks   | -0.33                 | 0.22            | 38.00           | -1.53   | 0.91    |
|                        |                    | N18-1635 - Checks     | 0.42                  | 0.22            | 38.00           | 1.91    | 0.67    |
|                        |                    | N18-1641 - Checks     | 0.58                  | 0.22            | 38.00           | 2.68    | 0.17    |
|                        |                    | N18-1674 - Checks     | 0.50                  | 0.22            | 38.00           | 2.30    | 0.38    |
|                        |                    | N18-1682 - Checks     | -0.17                 | 0.22            | 38.00           | -0.77   | 1.00    |
|                        |                    | N18-1731 - Checks     | 0.25                  | 0.22            | 38.00           | 1.15    | 0.99    |
|                        |                    | N18-1751 - Checks     | -0.17                 | 0.22            | 38.00           | -0.77   | 1.00    |
|                        |                    | N18-1763 - Checks     | 0.25                  | 0.22            | 38.00           | 1.15    | 0.99    |
|                        |                    | N18-1855 - Checks     | -0.17                 | 0.22            | 38.00           | -0.77   | 1.00    |
|                        |                    | N18-1956 - Checks     | 0.58                  | 0.22            | 38.00           | 2.68    | 0.17    |
|                        | Oil (% dry basis)  | LMN09-119 - Checks    | -4.23                 | 0.34            | 38.00           | -12.59  | 0.00    |
|                        |                    | N09-09 - Checks       | -2.90                 | 0.34            | 38.00           | -8.64   | 0.00    |
|                        |                    | N18-1572 - Checks     | -1.19                 | 0.34            | 38.00           | -3.55   | 0.02    |
|                        |                    | N18-1595 - Checks     | -2.97                 | 0.34            | 38.00           | -8.83   | 0.00    |
|                        |                    | N18-1604 - Checks     | -1.13                 | 0.34            | 38.00           | -3.37   | 0.03    |
|                        |                    | N18-1620 - Checks     | -0.85                 | 0.34            | 38.00           | -2.53   | 0.23    |
|                        |                    | N18-1632-1 - Checks   | -1.76                 | 0.34            | 38.00           | -5.25   | 0.00    |
|                        |                    | N18-1632-2 - Checks   | -1.54                 | 0.34            | 38.00           | -4.60   | 0.00    |
|                        |                    | N18-1635 - Checks     | -0.74                 | 0.34            | 38.00           | -2.20   | 0.44    |
|                        |                    | N18-1641 - Checks     | -1.07                 | 0.34            | 38.00           | -3.18   | 0.05    |

| Test name <sup>a</sup> | pheno <sup>b</sup>    | contrast <sup>c</sup> | estimate <sup>d</sup> | SE <sup>e</sup> | df <sup>f</sup> | t.ratio | p.value |
|------------------------|-----------------------|-----------------------|-----------------------|-----------------|-----------------|---------|---------|
|                        |                       | N18-1674 - Checks     | -1.17                 | 0.34            | 38.00           | -3.48   | 0.02    |
|                        |                       | N18-1682 - Checks     | -1.43                 | 0.34            | 38.00           | -4.25   | 0.00    |
|                        |                       | N18-1731 - Checks     | -2.07                 | 0.34            | 38.00           | -6.16   | 0.00    |
|                        |                       | N18-1751 - Checks     | -2.07                 | 0.34            | 38.00           | -6.16   | 0.00    |
|                        |                       | N18-1763 - Checks     | -2.73                 | 0.34            | 38.00           | -8.13   | 0.00    |
|                        |                       | N18-1855 - Checks     | -1.90                 | 0.34            | 38.00           | -5.65   | 0.00    |
|                        |                       | N18-1956 - Checks     | -1.04                 | 0.34            | 38.00           | -3.11   | 0.06    |
|                        | Protein (% dry basis) | LMN09-119 - Checks    | 10.10                 | 0.48            | 38.00           | 20.84   | 0.00    |
|                        |                       | N09-09 - Checks       | 5.69                  | 0.48            | 38.00           | 11.74   | 0.00    |
|                        |                       | N18-1572 - Checks     | 4.41                  | 0.48            | 38.00           | 9.10    | 0.00    |
|                        |                       | N18-1595 - Checks     | 6.47                  | 0.48            | 38.00           | 13.35   | 0.00    |
|                        |                       | N18-1604 - Checks     | 2.97                  | 0.48            | 38.00           | 6.13    | 0.00    |
|                        |                       | N18-1620 - Checks     | 2.38                  | 0.48            | 38.00           | 4.92    | 0.00    |
|                        |                       | N18-1632-1 - Checks   | 5.93                  | 0.48            | 38.00           | 12.24   | 0.00    |
|                        |                       | N18-1632-2 - Checks   | 5.59                  | 0.48            | 38.00           | 11.54   | 0.00    |
|                        |                       | N18-1635 - Checks     | 2.76                  | 0.48            | 38.00           | 5.71    | 0.00    |
|                        |                       | N18-1641 - Checks     | 2.37                  | 0.48            | 38.00           | 4.88    | 0.00    |
|                        |                       | N18-1674 - Checks     | 4.16                  | 0.48            | 38.00           | 8.60    | 0.00    |
|                        |                       | N18-1682 - Checks     | 4.15                  | 0.48            | 38.00           | 8.56    | 0.00    |
|                        |                       | N18-1731 - Checks     | 5.19                  | 0.48            | 38.00           | 10.71   | 0.00    |
|                        |                       | N18-1751 - Checks     | 3.84                  | 0.48            | 38.00           | 7.93    | 0.00    |
|                        |                       | N18-1763 - Checks     | 6.54                  | 0.48            | 38.00           | 13.50   | 0.00    |
|                        |                       | N18-1855 - Checks     | 6.62                  | 0.48            | 38.00           | 13.67   | 0.00    |
|                        |                       | N18-1956 - Checks     | 3.63                  | 0.48            | 38.00           | 7.50    | 0.00    |
|                        | Yield (kg/ha)         | LMN09-119 - Checks    | -381.92               | 168.17          | 38.00           | -2.27   | 0.39    |
|                        |                       | N09-09 - Checks       | -318.57               | 168.17          | 38.00           | -1.89   | 0.69    |
|                        |                       | N18-1572 - Checks     | -300.20               | 168.17          | 38.00           | -1.79   | 0.77    |
|                        |                       | N18-1595 - Checks     | 49.78                 | 168.17          | 38.00           | 0.30    | 1.00    |
|                        |                       | N18-1604 - Checks     | 51.20                 | 168.17          | 38.00           | 0.30    | 1.00    |
|                        |                       | N18-1620 - Checks     | 283.29                | 168.17          | 38.00           | 1.68    | 0.83    |
|                        |                       | N18-1632-1 - Checks   | 130.70                | 168.17          | 38.00           | 0.78    | 1.00    |
|                        |                       | N18-1632-2 - Checks   | 205.12                | 168.17          | 38.00           | 1.22    | 0.99    |

| Test name <sup>a</sup> | pheno <sup>b</sup>  | contrast <sup>c</sup> | estimate <sup>d</sup> | SE <sup>e</sup> | df <sup>f</sup> | t.ratio | p.value |
|------------------------|---------------------|-----------------------|-----------------------|-----------------|-----------------|---------|---------|
|                        |                     | N18-1635 - Checks     | -20.87                | 168.17          | 38.00           | -0.12   | 1.00    |
|                        |                     | N18-1641 - Checks     | -113.40               | 168.17          | 38.00           | -0.67   | 1.00    |
|                        |                     | N18-1674 - Checks     | -47.25                | 168.17          | 38.00           | -0.28   | 1.00    |
|                        |                     | N18-1682 - Checks     | 163.63                | 168.17          | 38.00           | 0.97    | 1.00    |
|                        |                     | N18-1731 - Checks     | -102.78               | 168.17          | 38.00           | -0.61   | 1.00    |
|                        |                     | N18-1751 - Checks     | -22.34                | 168.17          | 38.00           | -0.13   | 1.00    |
|                        |                     | N18-1763 - Checks     | -328.02               | 168.17          | 38.00           | -1.95   | 0.64    |
|                        |                     | N18-1855 - Checks     | -324.77               | 168.17          | 38.00           | -1.93   | 0.66    |
|                        |                     | N18-1956 - Checks     | -805.33               | 168.17          | 38.00           | -4.79   | 0.00    |
|                        | Seed Weight (grams) | LMN09-119 - Checks    | 2.30                  | 0.42            | 38.00           | 5.45    | 0.00    |
|                        |                     | N09-09 - Checks       | 0.58                  | 0.42            | 38.00           | 1.37    | 0.96    |
|                        |                     | N18-1572 - Checks     | 1.40                  | 0.42            | 38.00           | 3.32    | 0.03    |
|                        |                     | N18-1595 - Checks     | 0.21                  | 0.42            | 38.00           | 0.50    | 1.00    |
|                        |                     | N18-1604 - Checks     | 0.58                  | 0.42            | 38.00           | 1.37    | 0.96    |
|                        |                     | N18-1620 - Checks     | -0.30                 | 0.42            | 38.00           | -0.71   | 1.00    |
|                        |                     | N18-1632-1 - Checks   | 0.58                  | 0.42            | 38.00           | 1.37    | 0.96    |
|                        |                     | N18-1632-2 - Checks   | 0.50                  | 0.42            | 38.00           | 1.18    | 0.99    |
|                        |                     | N18-1635 - Checks     | 0.69                  | 0.42            | 38.00           | 1.63    | 0.86    |
|                        |                     | N18-1641 - Checks     | -0.09                 | 0.42            | 38.00           | -0.21   | 1.00    |
|                        |                     | N18-1674 - Checks     | 0.48                  | 0.42            | 38.00           | 1.13    | 0.99    |
|                        |                     | N18-1682 - Checks     | -0.04                 | 0.42            | 38.00           | -0.11   | 1.00    |
|                        |                     | N18-1731 - Checks     | 2.58                  | 0.42            | 38.00           | 6.11    | 0.00    |
|                        |                     | N18-1751 - Checks     | 0.61                  | 0.42            | 38.00           | 1.45    | 0.94    |
|                        |                     | N18-1763 - Checks     | -0.68                 | 0.42            | 38.00           | -1.61   | 0.88    |
|                        |                     | N18-1855 - Checks     | 2.34                  | 0.42            | 38.00           | 5.56    | 0.00    |
|                        |                     | N18-1956 - Checks     | 0.92                  | 0.42            | 38.00           | 2.19    | 0.46    |
|                        | Seed Quality        | LMN09-119 - Checks    | -0.10                 | 0.14            | 35.93           | -0.71   | 1.00    |
|                        |                     | N09-09 - Checks       | -0.15                 | 0.14            | 35.93           | -1.06   | 1.00    |
|                        |                     | N18-1572 - Checks     | -0.08                 | 0.14            | 35.93           | -0.54   | 1.00    |
|                        |                     | N18-1595 - Checks     | 0.02                  | 0.14            | 35.93           | 0.17    | 1.00    |
|                        |                     | N18-1604 - Checks     | 0.00                  | 0.14            | 35.93           | 0.00    | 1.00    |
|                        |                     | N18-1620 - Checks     | -0.03                 | 0.14            | 35.93           | -0.19   | 1.00    |

| Test name <sup>a</sup> | pheno <sup>b</sup>          | contrast <sup>c</sup> | estimate <sup>d</sup> | SE <sup>e</sup> | df <sup>f</sup> | t.ratio | p.value |
|------------------------|-----------------------------|-----------------------|-----------------------|-----------------|-----------------|---------|---------|
|                        |                             | N18-1632-1 - Checks   | 0.02                  | 0.14            | 35.93           | 0.17    | 1.00    |
|                        |                             | N18-1632-2 - Checks   | -0.03                 | 0.14            | 35.93           | -0.19   | 1.00    |
|                        |                             | N18-1635 - Checks     | -0.08                 | 0.14            | 35.93           | -0.52   | 1.00    |
|                        |                             | N18-1641 - Checks     | 0.12                  | 0.14            | 35.93           | 0.87    | 1.00    |
|                        |                             | N18-1674 - Checks     | -0.15                 | 0.14            | 35.93           | -1.06   | 1.00    |
|                        |                             | N18-1682 - Checks     | 0.02                  | 0.14            | 35.93           | 0.17    | 1.00    |
|                        |                             | N18-1731 - Checks     | 0.07                  | 0.14            | 35.93           | 0.52    | 1.00    |
|                        |                             | N18-1751 - Checks     | 0.02                  | 0.14            | 35.93           | 0.17    | 1.00    |
|                        |                             | N18-1763 - Checks     | -0.08                 | 0.14            | 35.93           | -0.54   | 1.00    |
|                        |                             | N18-1855 - Checks     | 0.20                  | 0.14            | 35.93           | 1.39    | 0.96    |
|                        |                             | N18-1956 - Checks     | 0.30                  | 0.14            | 35.93           | 2.10    | 0.52    |
|                        | Protein + Oil (% dry basis) | LMN09-119 - Checks    | 5.86                  | 0.32            | 38.00           | 18.14   | 0.00    |
|                        |                             | N09-09 - Checks       | 2.78                  | 0.32            | 38.00           | 8.60    | 0.00    |
|                        |                             | N18-1572 - Checks     | 3.21                  | 0.32            | 38.00           | 9.93    | 0.00    |
|                        |                             | N18-1595 - Checks     | 3.50                  | 0.32            | 38.00           | 10.82   | 0.00    |
|                        |                             | N18-1604 - Checks     | 1.84                  | 0.32            | 38.00           | 5.68    | 0.00    |
|                        |                             | N18-1620 - Checks     | 1.53                  | 0.32            | 38.00           | 4.74    | 0.00    |
|                        |                             | N18-1632-1 - Checks   | 4.16                  | 0.32            | 38.00           | 12.88   | 0.00    |
|                        |                             | N18-1632-2 - Checks   | 4.05                  | 0.32            | 38.00           | 12.52   | 0.00    |
|                        |                             | N18-1635 - Checks     | 2.02                  | 0.32            | 38.00           | 6.26    | 0.00    |
|                        |                             | N18-1641 - Checks     | 1.30                  | 0.32            | 38.00           | 4.01    | 0.00    |
|                        |                             | N18-1674 - Checks     | 2.99                  | 0.32            | 38.00           | 9.26    | 0.00    |
|                        |                             | N18-1682 - Checks     | 2.72                  | 0.32            | 38.00           | 8.40    | 0.00    |
|                        |                             | N18-1731 - Checks     | 3.12                  | 0.32            | 38.00           | 9.65    | 0.00    |
|                        |                             | N18-1751 - Checks     | 1.77                  | 0.32            | 38.00           | 5.48    | 0.00    |
|                        |                             | N18-1763 - Checks     | 3.80                  | 0.32            | 38.00           | 11.77   | 0.00    |
|                        |                             | N18-1855 - Checks     | 4.72                  | 0.32            | 38.00           | 14.62   | 0.00    |
|                        |                             | N18-1956 - Checks     | 2.59                  | 0.32            | 38.00           | 8.01    | 0.00    |
|                        | Meal Protein                | LMN09-119 - Checks    | 9.29                  | 0.45            | 38.00           | 20.81   | 0.00    |
|                        |                             | N09-09 - Checks       | 5.04                  | 0.45            | 38.00           | 11.29   | 0.00    |
|                        |                             | N18-1572 - Checks     | 4.52                  | 0.45            | 38.00           | 10.11   | 0.00    |
|                        |                             | N18-1595 - Checks     | 5.90                  | 0.45            | 38.00           | 13.21   | 0.00    |

| Test name <sup>a</sup> | pheno <sup>b</sup> | contrast <sup>c</sup> | estimate <sup>d</sup> | SE <sup>e</sup> | df <sup>f</sup> | t.ratio | p.value |
|------------------------|--------------------|-----------------------|-----------------------|-----------------|-----------------|---------|---------|
|                        |                    | N18-1604 - Checks     | 2.88                  | 0.45            | 38.00           | 6.45    | 0.00    |
|                        |                    | N18-1620 - Checks     | 2.35                  | 0.45            | 38.00           | 5.27    | 0.00    |
|                        |                    | N18-1632-1 - Checks   | 5.97                  | 0.45            | 38.00           | 13.37   | 0.00    |
|                        |                    | N18-1632-2 - Checks   | 5.70                  | 0.45            | 38.00           | 12.77   | 0.00    |
|                        |                    | N18-1635 - Checks     | 2.85                  | 0.45            | 38.00           | 6.38    | 0.00    |
|                        |                    | N18-1641 - Checks     | 2.21                  | 0.45            | 38.00           | 4.95    | 0.00    |
|                        |                    | N18-1674 - Checks     | 4.26                  | 0.45            | 38.00           | 9.54    | 0.00    |
|                        |                    | N18-1682 - Checks     | 4.09                  | 0.45            | 38.00           | 9.17    | 0.00    |
|                        |                    | N18-1731 - Checks     | 4.94                  | 0.45            | 38.00           | 11.06   | 0.00    |
|                        |                    | N18-1751 - Checks     | 3.38                  | 0.45            | 38.00           | 7.57    | 0.00    |
|                        |                    | N18-1763 - Checks     | 6.12                  | 0.45            | 38.00           | 13.69   | 0.00    |
|                        |                    | N18-1855 - Checks     | 6.69                  | 0.45            | 38.00           | 14.99   | 0.00    |
|                        |                    | N18-1956 - Checks     | 3.69                  | 0.45            | 38.00           | 8.26    | 0.00    |
| Test 2                 | Maturity Date      | N09-09 - Checks       | 2.77                  | 1.28            | 37.42           | 2.16    | 0.45    |
|                        |                    | N18-1575 - Checks     | 2.01                  | 1.28            | 37.42           | 1.57    | 0.88    |
|                        |                    | N18-1577 - Checks     | 1.94                  | 1.28            | 37.42           | 1.52    | 0.91    |
|                        |                    | N18-1579 - Checks     | 0.36                  | 1.28            | 37.42           | 0.28    | 1.00    |
|                        |                    | N18-1586 - Checks     | 1.35                  | 1.28            | 37.42           | 1.06    | 1.00    |
|                        |                    | N18-1615 - Checks     | 1.60                  | 1.28            | 37.42           | 1.25    | 0.98    |
|                        |                    | N18-1627 - Checks     | -0.05                 | 1.28            | 37.42           | -0.04   | 1.00    |
|                        |                    | N18-1628 - Checks     | 4.66                  | 1.28            | 37.42           | 3.64    | 0.01    |
|                        |                    | N18-1643 - Checks     | 2.70                  | 1.28            | 37.42           | 2.11    | 0.49    |
|                        |                    | N18-1659 - Checks     | 1.04                  | 1.28            | 37.42           | 0.81    | 1.00    |
|                        |                    | N18-1661 - Checks     | 1.04                  | 1.28            | 37.42           | 0.81    | 1.00    |
|                        |                    | N18-1761 - Checks     | -0.92                 | 1.28            | 37.42           | -0.72   | 1.00    |
|                        |                    | N18-1769 - Checks     | -1.01                 | 1.28            | 37.42           | -0.79   | 1.00    |
|                        |                    | N18-1783 - Checks     | 0.58                  | 1.28            | 37.42           | 0.45    | 1.00    |
|                        |                    | N18-1796 - Checks     | 1.32                  | 1.28            | 37.42           | 1.03    | 1.00    |
|                        |                    | N18-1820 - Checks     | 1.51                  | 1.28            | 37.42           | 1.18    | 0.99    |
|                        | Height (inches)    | N09-09 - Checks       | 3.94                  | 1.55            | 37.35           | 2.55    | 0.22    |
|                        |                    | N18-1575 - Checks     | 1.44                  | 1.55            | 37.35           | 0.93    | 1.00    |
|                        |                    | N18-1577 - Checks     | 2.06                  | 1.55            | 37.35           | 1.33    | 0.97    |

| Test name <sup>a</sup> | pheno <sup>b</sup> | contrast <sup>c</sup> | estimate <sup>d</sup> | SE <sup>e</sup> | df <sup>f</sup> | t.ratio | p.value |
|------------------------|--------------------|-----------------------|-----------------------|-----------------|-----------------|---------|---------|
|                        |                    | N18-1579 - Checks     | 1.70                  | 1.55            | 37.35           | 1.10    | 0.99    |
|                        |                    | N18-1586 - Checks     | 0.15                  | 1.55            | 37.35           | 0.10    | 1.00    |
|                        |                    | N18-1615 - Checks     | 1.50                  | 1.55            | 37.35           | 0.97    | 1.00    |
|                        |                    | N18-1627 - Checks     | 2.86                  | 1.55            | 37.35           | 1.85    | 0.70    |
|                        |                    | N18-1628 - Checks     | 5.09                  | 1.55            | 37.35           | 3.29    | 0.03    |
|                        |                    | N18-1643 - Checks     | 0.27                  | 1.59            | 40.25           | 0.17    | 1.00    |
|                        |                    | N18-1659 - Checks     | 2.63                  | 1.55            | 37.35           | 1.70    | 0.81    |
|                        |                    | N18-1661 - Checks     | 4.93                  | 1.55            | 37.35           | 3.18    | 0.05    |
|                        |                    | N18-1761 - Checks     | -0.13                 | 1.55            | 37.35           | -0.08   | 1.00    |
|                        |                    | N18-1769 - Checks     | -1.75                 | 1.55            | 37.35           | -1.13   | 0.99    |
|                        |                    | N18-1783 - Checks     | 3.19                  | 1.55            | 37.35           | 2.06    | 0.53    |
|                        |                    | N18-1796 - Checks     | 3.81                  | 1.55            | 37.35           | 2.47    | 0.26    |
|                        |                    | N18-1820 - Checks     | 1.57                  | 1.55            | 37.35           | 1.01    | 1.00    |
|                        | Lodging            | N09-09 - Checks       | 0.46                  | 0.26            | 37.16           | 1.77    | 0.76    |
|                        |                    | N18-1575 - Checks     | 0.51                  | 0.26            | 37.16           | 1.95    | 0.62    |
|                        |                    | N18-1577 - Checks     | 0.87                  | 0.26            | 37.16           | 3.34    | 0.03    |
|                        |                    | N18-1579 - Checks     | 0.63                  | 0.26            | 37.16           | 2.43    | 0.28    |
|                        |                    | N18-1586 - Checks     | 0.44                  | 0.26            | 37.16           | 1.71    | 0.80    |
|                        |                    | N18-1615 - Checks     | 0.39                  | 0.26            | 37.16           | 1.52    | 0.90    |
|                        |                    | N18-1627 - Checks     | 0.18                  | 0.26            | 37.16           | 0.68    | 1.00    |
|                        |                    | N18-1628 - Checks     | 1.19                  | 0.26            | 37.16           | 4.61    | 0.00    |
|                        |                    | N18-1643 - Checks     | 0.32                  | 0.26            | 37.16           | 1.22    | 0.98    |
|                        |                    | N18-1659 - Checks     | 0.43                  | 0.26            | 37.16           | 1.66    | 0.83    |
|                        |                    | N18-1661 - Checks     | 0.96                  | 0.26            | 37.16           | 3.71    | 0.01    |
|                        |                    | N18-1761 - Checks     | 0.16                  | 0.26            | 37.16           | 0.62    | 1.00    |
|                        |                    | N18-1769 - Checks     | 0.10                  | 0.26            | 37.16           | 0.38    | 1.00    |
|                        |                    | N18-1783 - Checks     | 0.51                  | 0.26            | 37.16           | 1.95    | 0.62    |
|                        |                    | N18-1796 - Checks     | 0.90                  | 0.26            | 37.16           | 3.46    | 0.02    |
|                        |                    | N18-1820 - Checks     | 0.49                  | 0.26            | 37.16           | 1.90    | 0.66    |
|                        | Oil (% dry basis)  | N09-09 - Checks       | -1.29                 | 0.26            | 37.87           | -5.03   | 0.00    |
|                        |                    | N18-1575 - Checks     | -0.81                 | 0.26            | 37.87           | -3.18   | 0.05    |
|                        |                    | N18-1577 - Checks     | -1.68                 | 0.26            | 37.87           | -6.57   | 0.00    |

| Test name <sup>a</sup> | pheno <sup>b</sup>    | contrast <sup>c</sup> | estimate <sup>d</sup> | SE <sup>e</sup> | df <sup>f</sup> | t.ratio | p.value |
|------------------------|-----------------------|-----------------------|-----------------------|-----------------|-----------------|---------|---------|
|                        |                       | N18-1579 - Checks     | 0.20                  | 0.26            | 37.87           | 0.79    | 1.00    |
|                        |                       | N18-1586 - Checks     | -0.68                 | 0.26            | 37.87           | -2.64   | 0.17    |
|                        |                       | N18-1615 - Checks     | 0.40                  | 0.26            | 37.87           | 1.57    | 0.88    |
|                        |                       | N18-1627 - Checks     | -0.71                 | 0.26            | 37.87           | -2.79   | 0.12    |
|                        |                       | N18-1628 - Checks     | -1.84                 | 0.26            | 37.87           | -7.18   | 0.00    |
|                        |                       | N18-1643 - Checks     | 0.30                  | 0.26            | 37.87           | 1.18    | 0.99    |
|                        |                       | N18-1659 - Checks     | -1.41                 | 0.26            | 37.87           | -5.51   | 0.00    |
|                        |                       | N18-1661 - Checks     | 0.04                  | 0.26            | 37.87           | 0.17    | 1.00    |
|                        |                       | N18-1761 - Checks     | -1.82                 | 0.26            | 37.87           | -7.11   | 0.00    |
|                        |                       | N18-1769 - Checks     | -1.57                 | 0.26            | 37.87           | -6.11   | 0.00    |
|                        |                       | N18-1783 - Checks     | -0.55                 | 0.26            | 37.87           | -2.14   | 0.47    |
|                        |                       | N18-1796 - Checks     | -1.15                 | 0.26            | 37.87           | -4.50   | 0.00    |
|                        |                       | N18-1820 - Checks     | 0.55                  | 0.26            | 37.87           | 2.13    | 0.48    |
|                        | Protein (% dry basis) | N09-09 - Checks       | 3.27                  | 0.46            | 37.88           | 7.10    | 0.00    |
|                        |                       | N18-1575 - Checks     | 5.76                  | 0.46            | 37.88           | 12.53   | 0.00    |
|                        |                       | N18-1577 - Checks     | 6.11                  | 0.46            | 37.88           | 13.28   | 0.00    |
|                        |                       | N18-1579 - Checks     | 0.69                  | 0.46            | 37.88           | 1.51    | 0.91    |
|                        |                       | N18-1586 - Checks     | 3.15                  | 0.46            | 37.88           | 6.86    | 0.00    |
|                        |                       | N18-1615 - Checks     | 0.74                  | 0.46            | 37.88           | 1.61    | 0.86    |
|                        |                       | N18-1627 - Checks     | 3.14                  | 0.46            | 37.88           | 6.82    | 0.00    |
|                        |                       | N18-1628 - Checks     | 6.78                  | 0.46            | 37.88           | 14.75   | 0.00    |
|                        |                       | N18-1643 - Checks     | 1.43                  | 0.46            | 37.88           | 3.12    | 0.05    |
|                        |                       | N18-1659 - Checks     | 5.22                  | 0.46            | 37.88           | 11.36   | 0.00    |
|                        |                       | N18-1661 - Checks     | 0.96                  | 0.46            | 37.88           | 2.10    | 0.50    |
|                        |                       | N18-1761 - Checks     | 6.58                  | 0.46            | 37.88           | 14.31   | 0.00    |
|                        |                       | N18-1769 - Checks     | 5.72                  | 0.46            | 37.88           | 12.45   | 0.00    |
|                        |                       | N18-1783 - Checks     | 3.88                  | 0.46            | 37.88           | 8.43    | 0.00    |
|                        |                       | N18-1796 - Checks     | 4.68                  | 0.46            | 37.88           | 10.18   | 0.00    |
|                        |                       | N18-1820 - Checks     | 0.54                  | 0.46            | 37.88           | 1.18    | 0.99    |
|                        | Yield (kg/ha)         | N09-09 - Checks       | 101.32                | 194.43          | 38.00           | 0.52    | 1.00    |
|                        |                       | N18-1575 - Checks     | -157.08               | 194.43          | 38.00           | -0.81   | 1.00    |
|                        |                       | N18-1577 - Checks     | 164.27                | 194.43          | 38.00           | 0.84    | 1.00    |



| Test name <sup>a</sup> | pheno <sup>b</sup>  | contrast <sup>c</sup> | estimate <sup>d</sup> | SE <sup>e</sup> | df <sup>f</sup> | t.ratio | p.value |
|------------------------|---------------------|-----------------------|-----------------------|-----------------|-----------------|---------|---------|
|                        |                     | N18-1579 - Checks     | 292.57                | 194.43          | 38.00           | 1.50    | 0.91    |
|                        |                     | N18-1586 - Checks     | 281.69                | 194.43          | 38.00           | 1.45    | 0.93    |
|                        |                     | N18-1615 - Checks     | 463.66                | 194.43          | 38.00           | 2.38    | 0.30    |
|                        |                     | N18-1627 - Checks     | 271.09                | 194.43          | 38.00           | 1.39    | 0.95    |
|                        |                     | N18-1628 - Checks     | -557.45               | 194.43          | 38.00           | -2.87   | 0.10    |
|                        |                     | N18-1643 - Checks     | -192.04               | 194.43          | 38.00           | -0.99   | 1.00    |
|                        |                     | N18-1659 - Checks     | 12.34                 | 194.43          | 38.00           | 0.06    | 1.00    |
|                        |                     | N18-1661 - Checks     | 217.42                | 194.43          | 38.00           | 1.12    | 0.99    |
|                        |                     | N18-1761 - Checks     | 207.98                | 194.43          | 38.00           | 1.07    | 1.00    |
|                        |                     | N18-1769 - Checks     | -263.53               | 194.43          | 38.00           | -1.36   | 0.96    |
|                        |                     | N18-1783 - Checks     | -472.74               | 194.43          | 38.00           | -2.43   | 0.27    |
|                        |                     | N18-1796 - Checks     | 322.11                | 194.43          | 38.00           | 1.66    | 0.83    |
|                        |                     | N18-1820 - Checks     | 286.93                | 194.43          | 38.00           | 1.48    | 0.92    |
|                        | Seed Weight (grams) | N09-09 - Checks       | 2.19                  | 0.60            | 38.00           | 3.64    | 0.01    |
|                        |                     | N18-1575 - Checks     | 2.71                  | 0.60            | 38.00           | 4.51    | 0.00    |
|                        |                     | N18-1577 - Checks     | 0.95                  | 0.60            | 38.00           | 1.57    | 0.88    |
|                        |                     | N18-1579 - Checks     | 0.07                  | 0.60            | 38.00           | 0.12    | 1.00    |
|                        |                     | N18-1586 - Checks     | -0.82                 | 0.60            | 38.00           | -1.36   | 0.96    |
|                        |                     | N18-1615 - Checks     | 1.48                  | 0.60            | 38.00           | 2.46    | 0.26    |
|                        |                     | N18-1627 - Checks     | 2.56                  | 0.60            | 38.00           | 4.25    | 0.00    |
|                        |                     | N18-1628 - Checks     | -0.02                 | 0.60            | 38.00           | -0.03   | 1.00    |
|                        |                     | N18-1643 - Checks     | 0.46                  | 0.60            | 38.00           | 0.76    | 1.00    |
|                        |                     | N18-1659 - Checks     | -0.53                 | 0.60            | 38.00           | -0.88   | 1.00    |
|                        |                     | N18-1661 - Checks     | -0.39                 | 0.60            | 38.00           | -0.64   | 1.00    |
|                        |                     | N18-1761 - Checks     | 0.82                  | 0.60            | 38.00           | 1.37    | 0.96    |
|                        |                     | N18-1769 - Checks     | 1.29                  | 0.60            | 38.00           | 2.15    | 0.46    |
|                        |                     | N18-1783 - Checks     | 0.55                  | 0.60            | 38.00           | 0.91    | 1.00    |
|                        |                     | N18-1796 - Checks     | -0.96                 | 0.60            | 38.00           | -1.60   | 0.86    |
|                        |                     | N18-1820 - Checks     | 1.38                  | 0.60            | 38.00           | 2.30    | 0.36    |
|                        | Seed Quality        | N09-09 - Checks       | 0.07                  | 0.14            | 33.57           | 0.51    | 1.00    |
|                        |                     | N18-1575 - Checks     | -0.18                 | 0.14            | 33.57           | -1.26   | 0.98    |
|                        |                     | N18-1577 - Checks     | -0.02                 | 0.14            | 33.57           | -0.12   | 1.00    |

| Test name <sup>a</sup> | pheno <sup>b</sup>          | contrast <sup>c</sup> | estimate <sup>d</sup> | SE <sup>e</sup> | df <sup>f</sup> | t.ratio | p.value |
|------------------------|-----------------------------|-----------------------|-----------------------|-----------------|-----------------|---------|---------|
|                        |                             | N18-1579 - Checks     | -0.07                 | 0.14            | 33.57           | -0.50   | 1.00    |
|                        |                             | N18-1586 - Checks     | -0.14                 | 0.14            | 33.57           | -1.01   | 1.00    |
|                        |                             | N18-1615 - Checks     | -0.25                 | 0.14            | 33.57           | -1.78   | 0.76    |
|                        |                             | N18-1627 - Checks     | -0.07                 | 0.14            | 33.57           | -0.50   | 1.00    |
|                        |                             | N18-1628 - Checks     | 0.29                  | 0.14            | 33.57           | 2.04    | 0.55    |
|                        |                             | N18-1643 - Checks     | 0.02                  | 0.15            | 36.04           | 0.16    | 1.00    |
|                        |                             | N18-1659 - Checks     | 0.04                  | 0.14            | 33.57           | 0.26    | 1.00    |
|                        |                             | N18-1661 - Checks     | 0.21                  | 0.14            | 33.57           | 1.53    | 0.90    |
|                        |                             | N18-1761 - Checks     | -0.05                 | 0.14            | 33.57           | -0.38   | 1.00    |
|                        |                             | N18-1769 - Checks     | 0.18                  | 0.14            | 33.57           | 1.28    | 0.98    |
|                        |                             | N18-1783 - Checks     | 0.07                  | 0.14            | 33.57           | 0.52    | 1.00    |
|                        |                             | N18-1796 - Checks     | -0.21                 | 0.14            | 33.57           | -1.52   | 0.91    |
|                        |                             | N18-1820 - Checks     | 0.04                  | 0.14            | 33.57           | 0.26    | 1.00    |
|                        | Protein + Oil (% dry basis) | N09-09 - Checks       | 1.98                  | 0.36            | 37.93           | 5.53    | 0.00    |
|                        |                             | N18-1575 - Checks     | 4.95                  | 0.36            | 37.93           | 13.84   | 0.00    |
|                        |                             | N18-1577 - Checks     | 4.42                  | 0.36            | 37.93           | 12.37   | 0.00    |
|                        |                             | N18-1579 - Checks     | 0.90                  | 0.36            | 37.93           | 2.51    | 0.23    |
|                        |                             | N18-1586 - Checks     | 2.47                  | 0.36            | 37.93           | 6.92    | 0.00    |
|                        |                             | N18-1615 - Checks     | 1.14                  | 0.36            | 37.93           | 3.19    | 0.04    |
|                        |                             | N18-1627 - Checks     | 2.42                  | 0.36            | 37.93           | 6.78    | 0.00    |
|                        |                             | N18-1628 - Checks     | 4.94                  | 0.36            | 37.93           | 13.82   | 0.00    |
|                        |                             | N18-1643 - Checks     | 1.74                  | 0.36            | 37.93           | 4.86    | 0.00    |
|                        |                             | N18-1659 - Checks     | 3.81                  | 0.36            | 37.93           | 10.66   | 0.00    |
|                        |                             | N18-1661 - Checks     | 1.01                  | 0.36            | 37.93           | 2.82    | 0.12    |
|                        |                             | N18-1761 - Checks     | 4.76                  | 0.36            | 37.93           | 13.31   | 0.00    |
|                        |                             | N18-1769 - Checks     | 4.16                  | 0.36            | 37.93           | 11.63   | 0.00    |
|                        |                             | N18-1783 - Checks     | 3.33                  | 0.36            | 37.93           | 9.31    | 0.00    |
|                        |                             | N18-1796 - Checks     | 3.53                  | 0.36            | 37.93           | 9.86    | 0.00    |
|                        |                             | N18-1820 - Checks     | 1.09                  | 0.36            | 37.93           | 3.04    | 0.07    |
|                        | Meal Protein                | N09-09 - Checks       | 3.09                  | 0.47            | 37.91           | 6.58    | 0.00    |
|                        |                             | N18-1575 - Checks     | 6.24                  | 0.47            | 37.91           | 13.28   | 0.00    |
|                        |                             | N18-1577 - Checks     | 6.12                  | 0.47            | 37.91           | 13.03   | 0.00    |

| Test name <sup>a</sup> | pheno <sup>b</sup> | contrast <sup>c</sup> | estimate <sup>d</sup> | SE <sup>e</sup> | df <sup>f</sup> | t.ratio | p.value |
|------------------------|--------------------|-----------------------|-----------------------|-----------------|-----------------|---------|---------|
|                        |                    | N18-1579 - Checks     | 0.93                  | 0.47            | 37.91           | 1.97    | 0.60    |
|                        |                    | N18-1586 - Checks     | 3.30                  | 0.47            | 37.91           | 7.03    | 0.00    |
|                        |                    | N18-1615 - Checks     | 1.09                  | 0.47            | 37.91           | 2.32    | 0.34    |
|                        |                    | N18-1627 - Checks     | 3.25                  | 0.47            | 37.91           | 6.93    | 0.00    |
|                        |                    | N18-1628 - Checks     | 6.81                  | 0.47            | 37.91           | 14.49   | 0.00    |
|                        |                    | N18-1643 - Checks     | 1.85                  | 0.47            | 37.91           | 3.93    | 0.01    |
|                        |                    | N18-1659 - Checks     | 5.27                  | 0.47            | 37.91           | 11.21   | 0.00    |
|                        |                    | N18-1661 - Checks     | 1.16                  | 0.47            | 37.91           | 2.46    | 0.26    |
|                        |                    | N18-1761 - Checks     | 6.58                  | 0.47            | 37.91           | 14.02   | 0.00    |
|                        |                    | N18-1769 - Checks     | 5.75                  | 0.47            | 37.91           | 12.24   | 0.00    |
|                        |                    | N18-1783 - Checks     | 4.22                  | 0.47            | 37.91           | 8.97    | 0.00    |
|                        |                    | N18-1796 - Checks     | 4.79                  | 0.47            | 37.91           | 10.19   | 0.00    |
|                        |                    | N18-1820 - Checks     | 0.93                  | 0.47            | 37.91           | 1.98    | 0.60    |

<sup>a</sup>The test which a RIL and it's associated checks belong to.

<sup>b</sup>The phenotype .

<sup>c</sup>The contrast label in the form RIL name - Checks.

<sup>d</sup>The estimated difference between the RIL and the check average.

<sup>e</sup>The standard error on the estimation of the contrast.

<sup>f</sup>Degrees of freedom.
