# Supplementary material
Source: MDPI journal article supplement (https://www.mdpi.com/2673-7655/3/4/29)
Supplement: s1 [file s1]

Archive with 6 entries (6 files):
- supplemental figure S1.pdf
- supplemental figure S2.pdf
- supplemental figure S3.pdf
- supplemental figure S4.pdf
- supplementary table S1.pdf
- supplementary table S2.pdf
