# Supplementary material
Source: MDPI journal article supplement (https://www.mdpi.com/2673-7655/3/4/29)

Pearson's  
Correlation

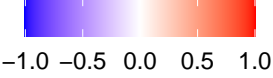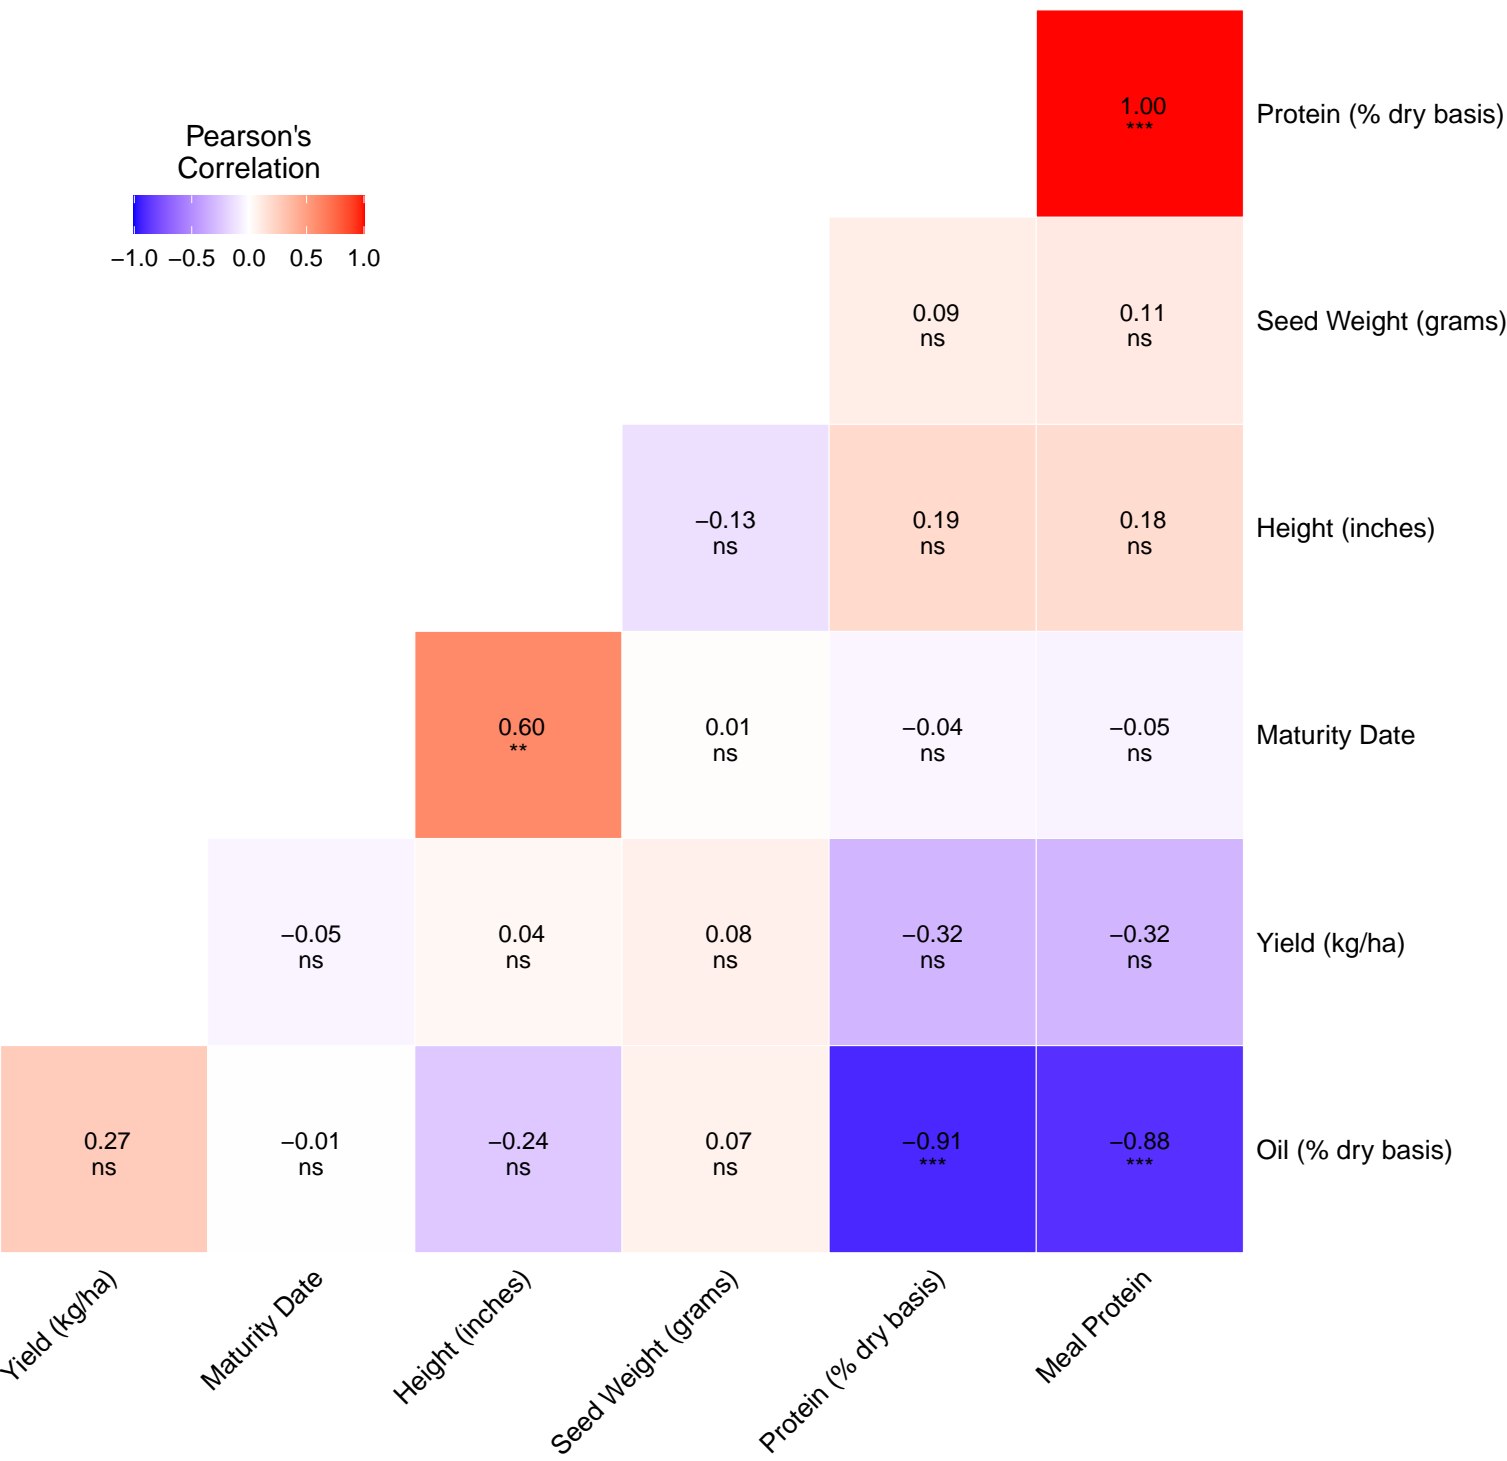

ns p >= 0.05; \* p < 0.05; \*\* p < 0.01; and \*\*\* p < 0.001

Supplement: s1 [file s1]

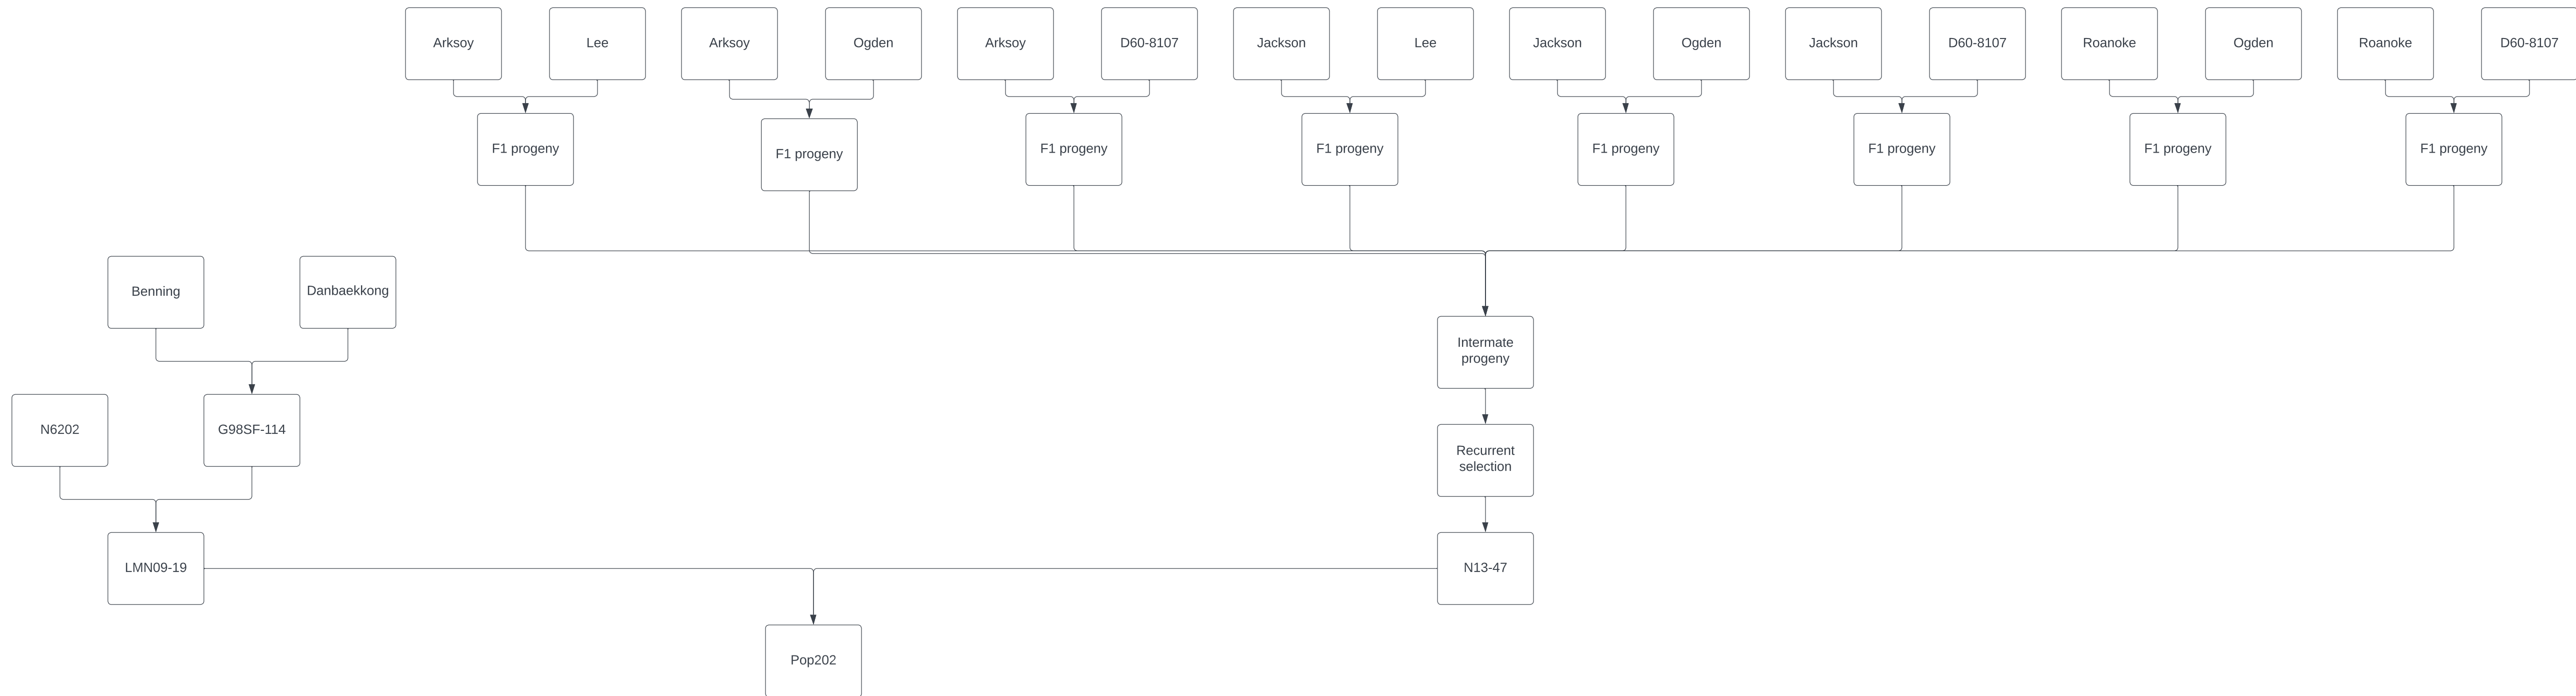

Supplement: s1 [file s1]

Pearson's  
Correlation

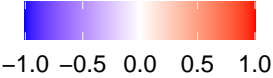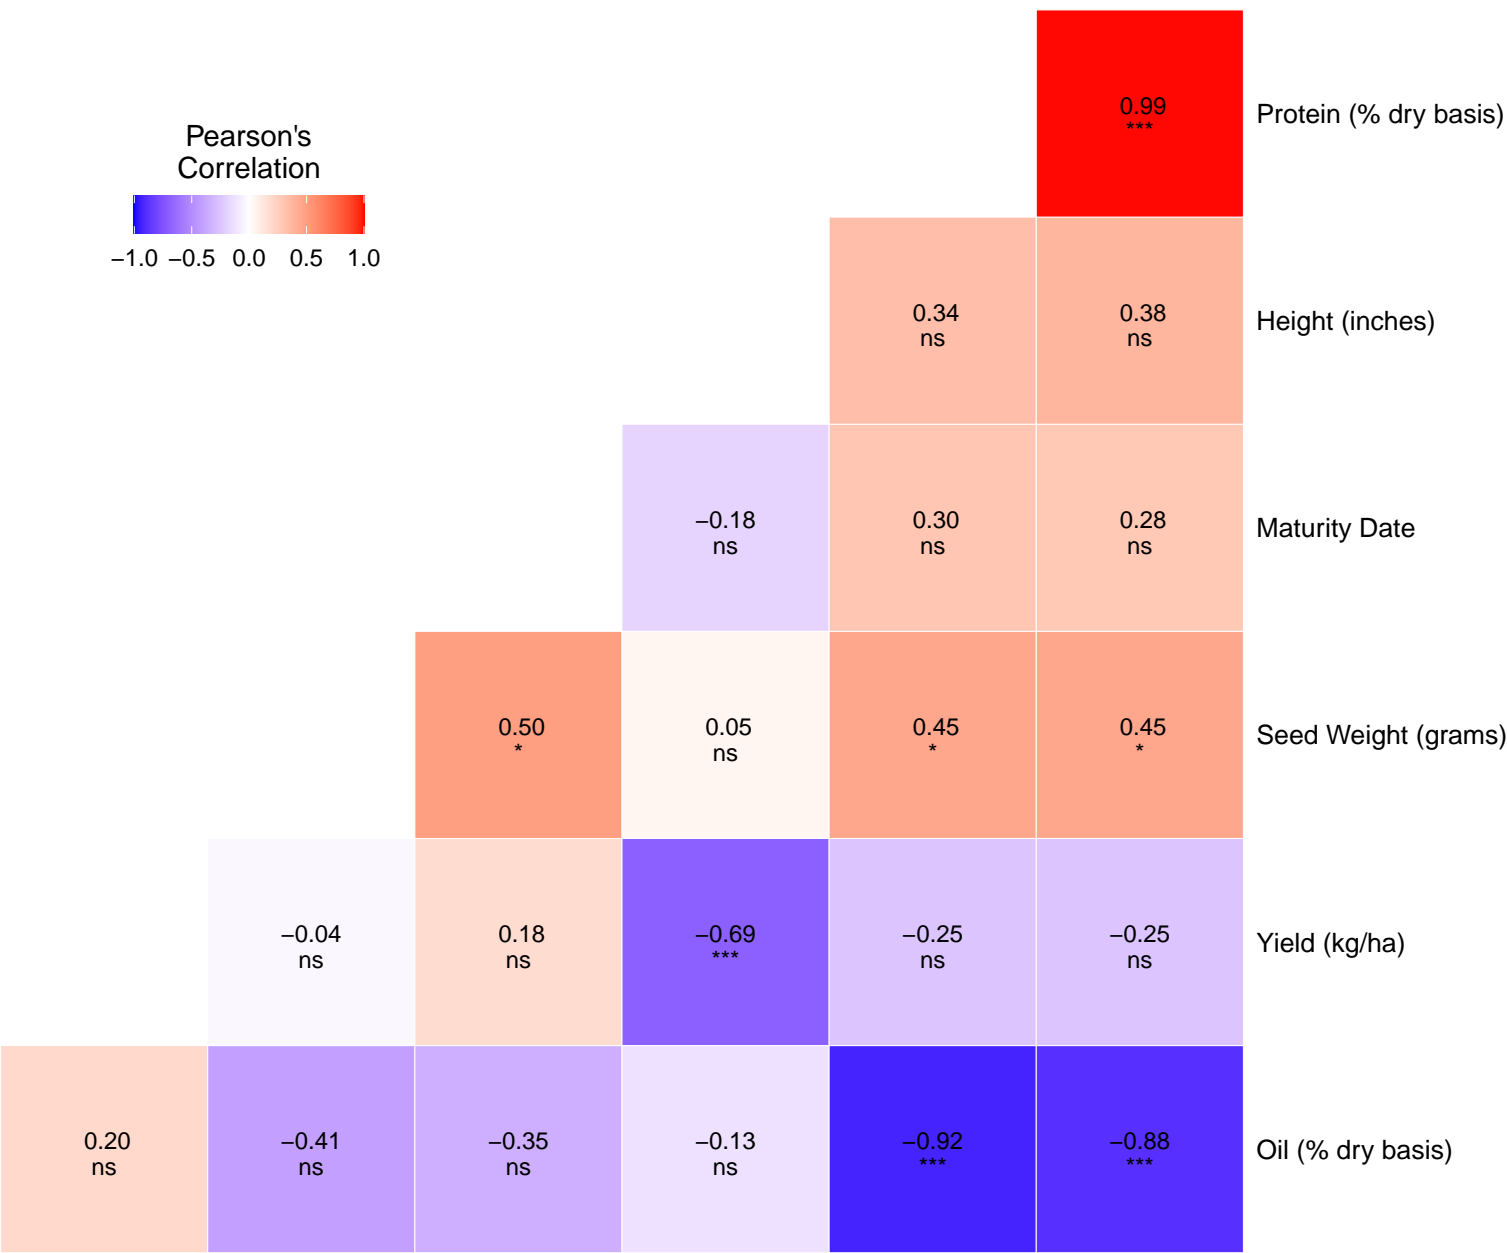

ns p >= 0.05; \* p < 0.05; \*\* p < 0.01; and \*\*\* p < 0.001

Supplement: s1 [file s1]

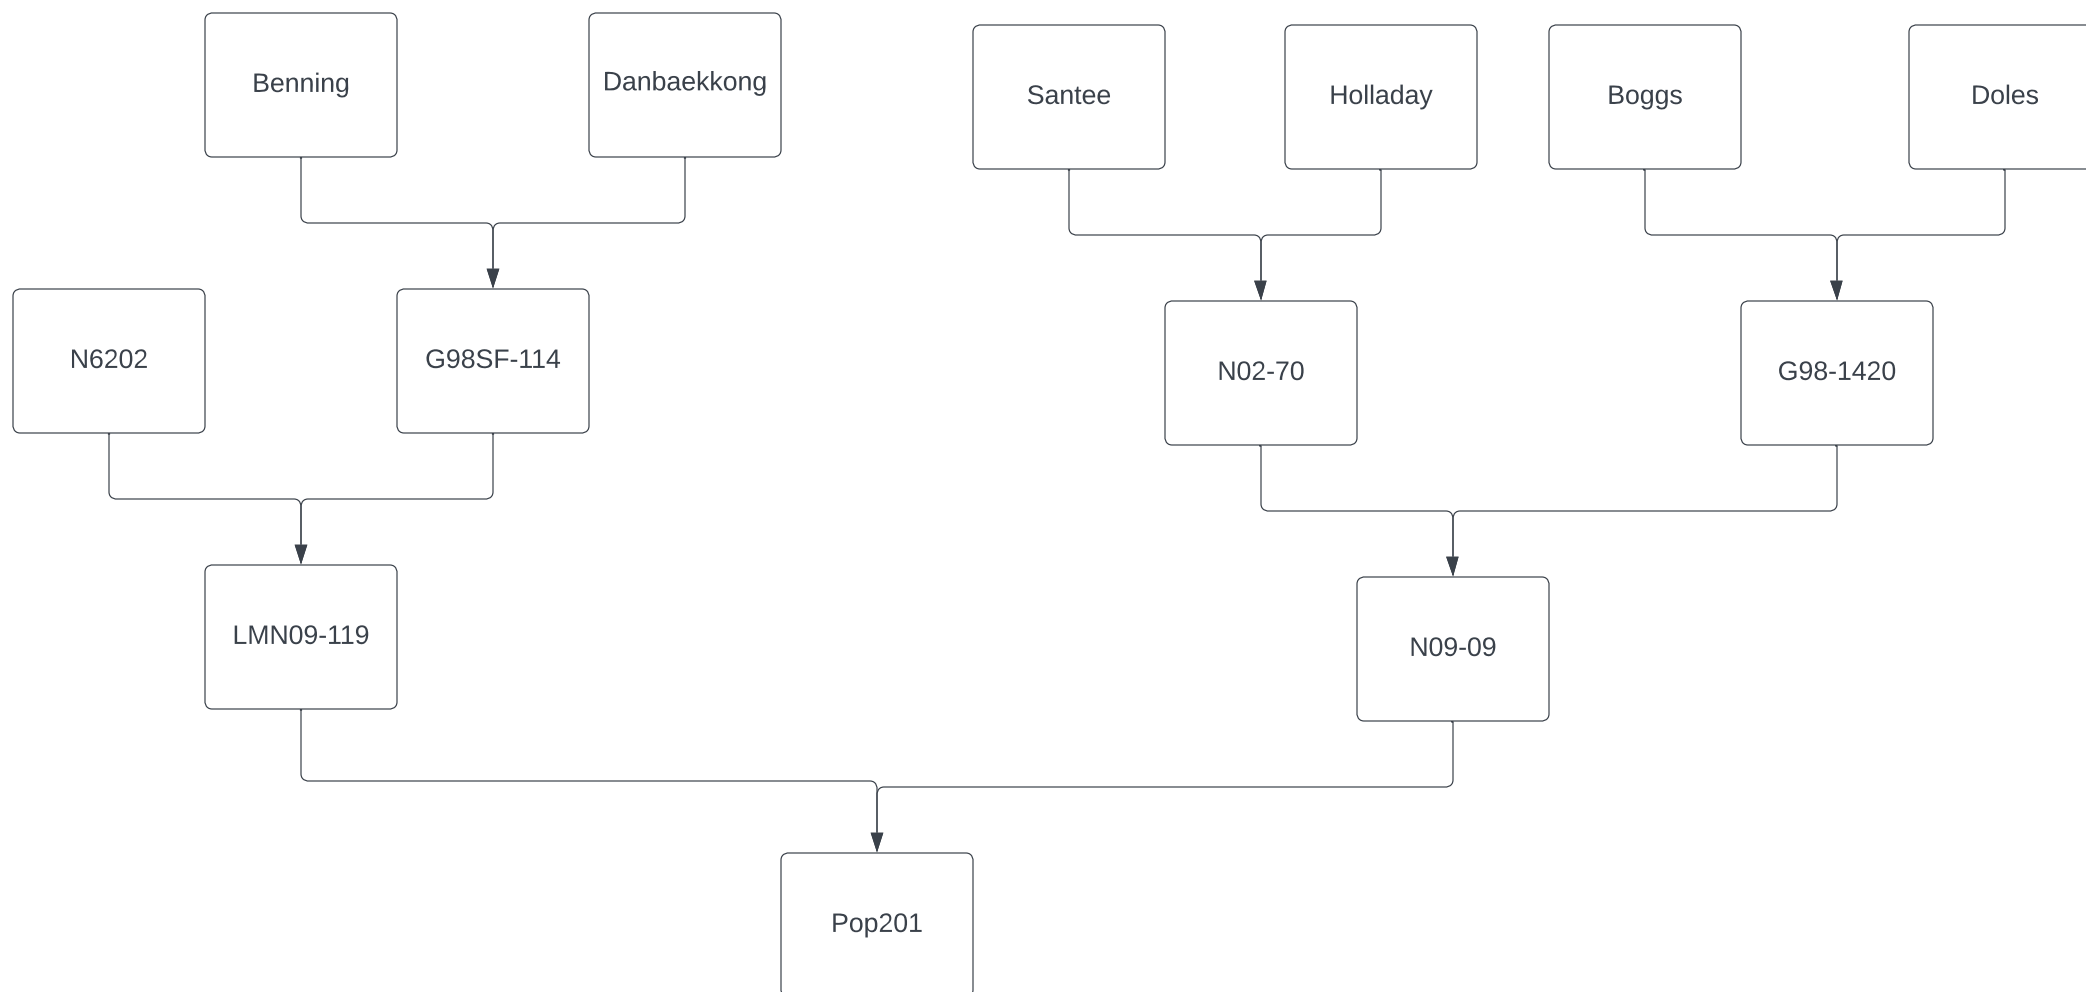

Supplement: s1 [file s1]
